# Supplementary material
Source: PubMed Central journal article supplement (PMC4218955)
Supplement: ncomms6255-s1.pdf [file ncomms6255-s1.pdf]

**SUPPLEMENTARY INFORMATION**

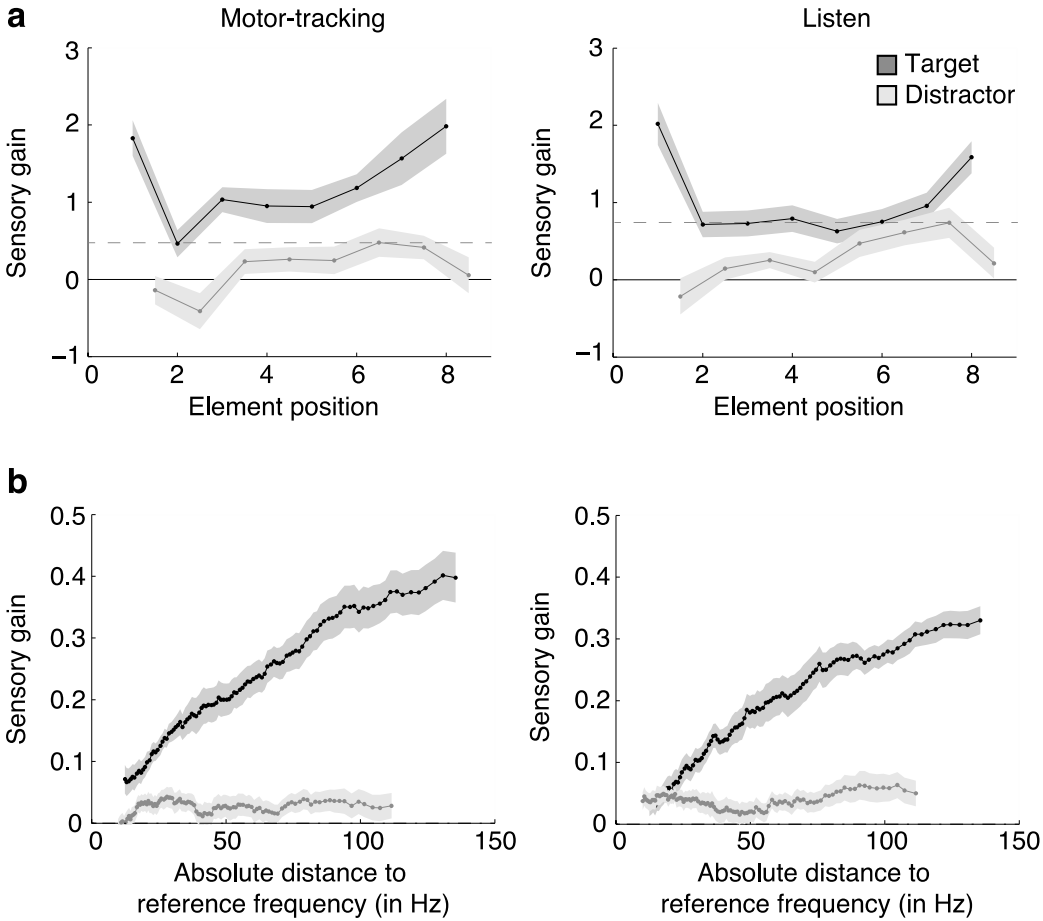

**Supplementary Figure 1. Experiment 1.** Sensory gain profiles for targets and distractors as a function of (a) element position in the sequence and (b) absolute distance to the reference frequency, for *motor-tracking* (left panels) and *listen* (right panels) conditions. Shaded error bars indicate s.e.m (n = 21).

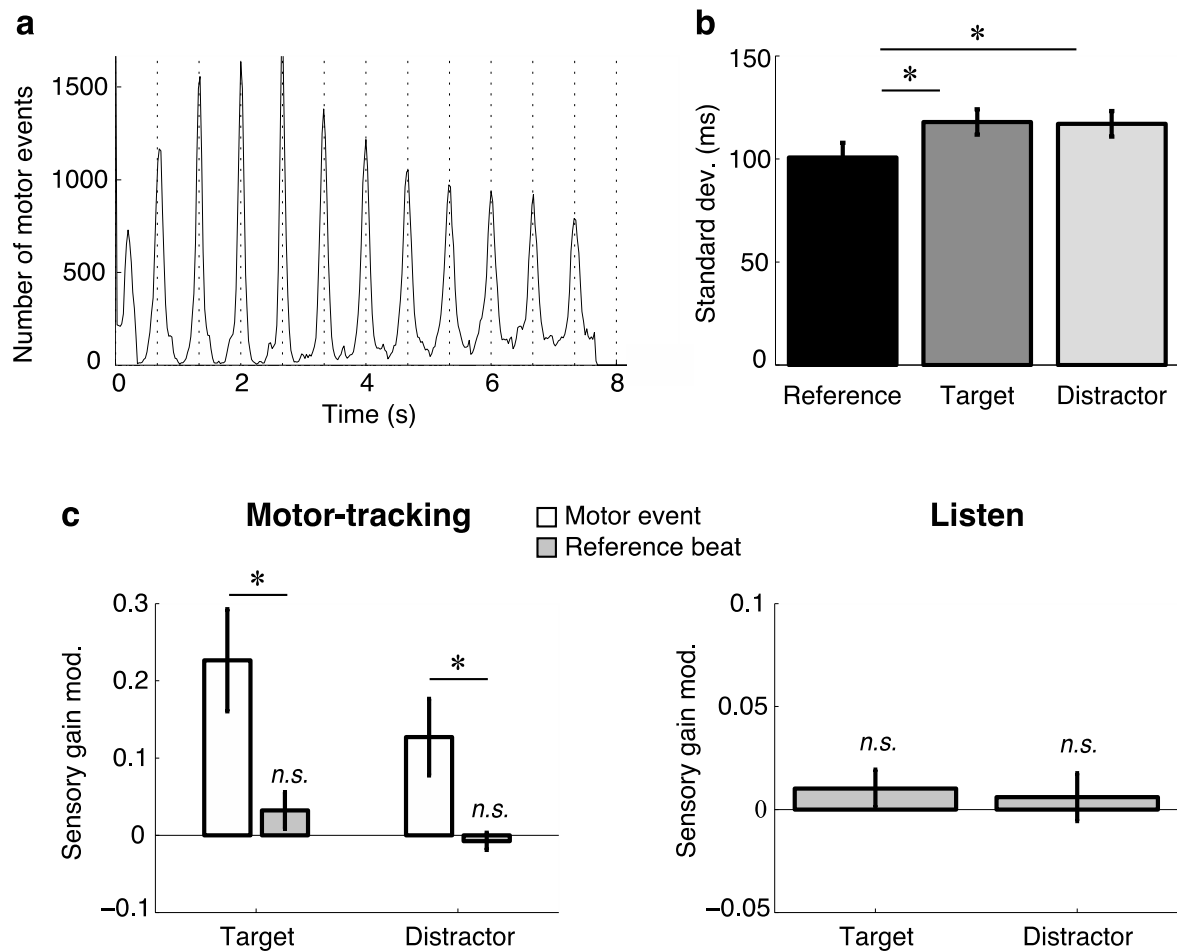

**Supplementary Figure 2. Experiment 1.** (a) Averaged motor acts distribution over time, superimposed with the reference beat (dashed lines). (b) Standard deviation of the distribution of the temporal distance between each motor act and the theoretical reference beat (black), targets (dark grey) and distractors (light grey). (c) *Left panel:* Amount of behavioral variability explained by taking into account the temporal distance between tones and motor acts (white bars) or reference beat (grey bars) occurrences, in a parametric model linking positive modulation with simultaneity ( $\varphi = 0$ ). *Right panel:* Amount of behavioral variability explained in the *listen* condition by taking into account the temporal distance between tones and reference beat occurrences. Error bars indicate s.e.m. Stars/*n.s.* indicate significant/non-significant differences ( $n = 21$ ; paired  $t$  tests or  $t$  tests against zero;  $*p < 0.05$ ).

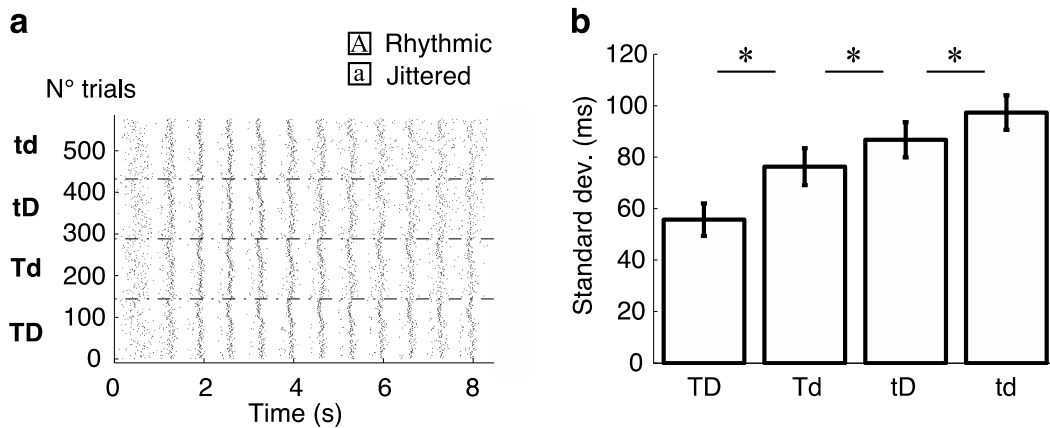

**Supplementary Figure 3. Experiment 2.** (a) Single-trial motor acts distribution over time for one representative participant, sorted per condition. T/t indicates *target* rhythmic/jittered conditions and D/d *distractor* rhythmic/jittered conditions. (b) Standard deviation of distribution of the temporal distance between each motor act and the theoretical reference beat, for each condition. Error bars indicate s.e.m. Stars indicate significant differences ( $n = 18$ ; paired  $t$  tests;  $*p < 0.05$ ).

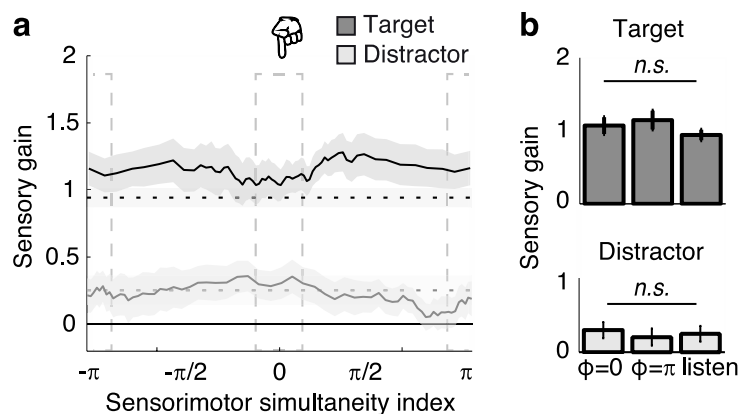

**Supplementary Figure 4. Experiment 3.** (a) Target/distractor gains sorted according to their temporal distance to motor acts (SSI; dashed lines correspond to the *listen* condition). (b) Detail of the model-predicted best ( $\phi = 0$ ) and worst ( $\phi = \pi$ ) octile, and comparison with the *listen* condition. (Shaded) error bars indicate s.e.m. N.s. indicates non-significant differences ( $n = 21$ ; paired  $t$  tests;  $*p < 0.05$ ).
